# Supplementary material for: Analysis of Outcomes Associated With Outpatient Management of Nonoperatively Treated Patients With Appendicitis
Source: PubMed Central journal article supplement (PMC9250049; doi:10.1001/jamanetworkopen.2022.20039), 2022-07-01
Supplement: jamanetwopen-e2220039-s001.pdf [file jamanetwopen-e2220039-s001.pdf]

## Supplementary Online Content

Writing Group for the CODA Collaborative. Analysis of outcomes associated with outpatient management of nonoperatively treated patients with appendicitis. *JAMA Network Open*. 2022;5(7):e2220039. doi:10.1001/jamanetworkopen.2022.20039

**eAppendix.** Variables Used in Multiple Imputations

**eTable.** Characteristics of CODA Trial Participants Randomized to Antibiotics with Appendectomy Within 24 Hours of Emergency Department Arrival

**eFigure 1.** Randomization and Disposition of Participants in the CODA Trial

**eFigure 2.** Cumulative Incidence of Appendectomy Through Two Years in the Antibiotic Group by Emergency Department Discharge Within 24 Hours or Later

This supplementary material has been provided by the authors to give readers additional information about their work.

## **eAppendix. Variables Used in Multiple Imputations**

### **Variables used in multiple imputations (all variables were obtained at index except where noted):**

Early discharge status, appendectomy within 7 days, site, appendicolith on imaging, periappendiceal fat on imaging, periappendiceal fluid on imaging, appendiceal diameter on imaging, height (cm), weight (kg), diabetes, Alvarado score, Charlson score, EQ-5D, lives alone vs. with others, primary language (English/other or Spanish), insurance (commercial, Medicare/Tricare, Medicaid/state, or other/none), employment (employed, student, or unemployed/other), education (HS/GED or less, or some beyond HS/GED), number of adults in the household with income, number of dependents, sharing responsibilities of dependents, physical at work (most or all of the time, some of the time or less, or not employed), smoking history (yes or no), combined household income, Global Health questions 1-9 (each with a five-point scale rating, covering general health, quality of life, physical health, mental health, social activities/relationships, and everyday physical activities), health literacy help (yes or no), below poverty or Medicaid/state, age, sex, fever, nausea or vomiting, white blood cell count, maximum pain score recorded in the emergency department, and symptom duration.

**eTable. Characteristics of CODA Trial Participants Randomized to Antibiotics with Appendectomy Within 24 Hours of Emergency Department Arrival**

|                                                         | Appendectomy<br>0-24 hours<br>(n=42) |
|---------------------------------------------------------|--------------------------------------|
|                                                         | <b>n (%)</b>                         |
| <b>Age in years</b>                                     |                                      |
| <30                                                     | 13 (31.0)                            |
| 30-39                                                   | 10 (23.8)                            |
| 40-49                                                   | 10 (23.8)                            |
| 50-59                                                   | 6 (14.3)                             |
| 60-69                                                   | 1 (2.4)                              |
| 70-79                                                   | 2 (4.8)                              |
| ≥80                                                     | 0 (0.0)                              |
| <b>Sex</b>                                              |                                      |
| Male                                                    | 24 (57.1)                            |
| Female                                                  | 18 (42.9)                            |
| <b>Race<sup>a</sup></b>                                 |                                      |
| White                                                   | 19 (46.3)                            |
| Black, African American                                 | 6 (14.6)                             |
| American Indian or Alaska Native                        | 1 (2.4)                              |
| Asian                                                   | 3 (7.1)                              |
| Native Hawaiian or Other Pacific Islander               | 0 (0.0)                              |
| Other race                                              | 10 (24.3)                            |
| Multiple races                                          | 2 (4.9)                              |
| <b>Hispanic</b>                                         |                                      |
| No                                                      | 23 (54.8)                            |
| Yes                                                     | 19 (45.2)                            |
| <b>Primary language</b>                                 |                                      |
| English                                                 | 30 (71.4)                            |
| Spanish                                                 | 10 (23.8)                            |
| Other                                                   | 2 (4.8)                              |
| <b>Health insurance</b>                                 |                                      |
| Commercial                                              | 14 (33.3)                            |
| Medicare or Tricare                                     | 3 (7.1)                              |
| Medicaid or state                                       | 10 (23.8)                            |
| Other or none                                           | 14 (33.3)                            |
| <b>Health literacy help<sup>a</sup></b>                 |                                      |
| Never/rarely                                            | 32 (78.0)                            |
| Sometimes or more                                       | 9 (22.0)                             |
| <b>Below federal poverty level/Medicaid<sup>a</sup></b> |                                      |
| No                                                      | 20 (69.0)                            |

|                                                      |                  |
|------------------------------------------------------|------------------|
| Yes                                                  | 9 (31.0)         |
| <b>Dependents</b>                                    |                  |
| No                                                   | 15 (35.7)        |
| Yes                                                  | 27 (64.2)        |
| <b>Body mass index, kg/m<sup>2a</sup></b>            |                  |
| <25                                                  | 7 (17.5)         |
| 25-35                                                | 28 (70.0)        |
| >35                                                  | 5 (12.5)         |
| <b>Symptom duration, days</b>                        |                  |
| <1                                                   | 7 (16.7)         |
| 1-<2                                                 | 20 (47.6)        |
| ≥2                                                   | 15 (35.7)        |
| <b>Fever</b>                                         |                  |
| No                                                   | 31 (73.8)        |
| Yes                                                  | 11 (26.1)        |
| <b>Nausea, vomiting, or anorexia</b>                 |                  |
| No                                                   | 11 (26.2)        |
| Yes                                                  | 31 (73.8)        |
| <b>CT only</b>                                       |                  |
| No                                                   | 6 (14.2)         |
| Yes                                                  | 36 (85.7)        |
| <b>Ultrasound only</b>                               |                  |
| No                                                   | 41 (97.6)        |
| Yes                                                  | 1 (2.4)          |
| <b>Appendicolith</b>                                 |                  |
| No                                                   | 25 (59.5)        |
| Yes                                                  | 17 (40.5)        |
| <b>Perforation, abscess, or phlegmon<sup>a</sup></b> |                  |
| No or not mentioned                                  | 35 (85.3)        |
| Yes                                                  | 6 (14.6)         |
|                                                      | <b>mean (SD)</b> |
| <b>Instrumental support<sup>b</sup></b>              | 16 (4.7)         |
| <b>Charlson score<sup>a</sup></b>                    | 0.4 (0.9)        |
| <b>Alvarado score<sup>a</sup></b>                    | 7.0 (1.5)        |
| <b>Pain score in past 7 days</b>                     | 6.5 (3.1)        |
| <b>White blood count, K/uL<sup>a</sup></b>           | 14 (4.1)         |
| <b>Appendiceal diameter, mm<sup>a</sup></b>          | 12 (3.9)         |

CODA, Comparison of Antibiotic Drugs and Appendectomy; CT, computed tomography

<sup>a</sup> Participants with missing data were excluded from the denominator. Missing data occurred for participants as follows: race - 1; health literacy help - 1; below federal poverty level - 13; body mass index - 2; perforation, abscess, or phlegmon - 1; instrumental support - 1; Charlson score - 0; Alvarado score -2; pain score - 0; white blood cell count - 0; and appendiceal diameter - 4.

<sup>b</sup> Instrumental support score was determined by PROMIS patient-related outcome of having someone to take the patient to the doctor, run errands, and help with daily chores and if confined to bed.<sup>11</sup>

**eFigure 1. Randomization and Disposition of Participants in the CODA Trial**

>

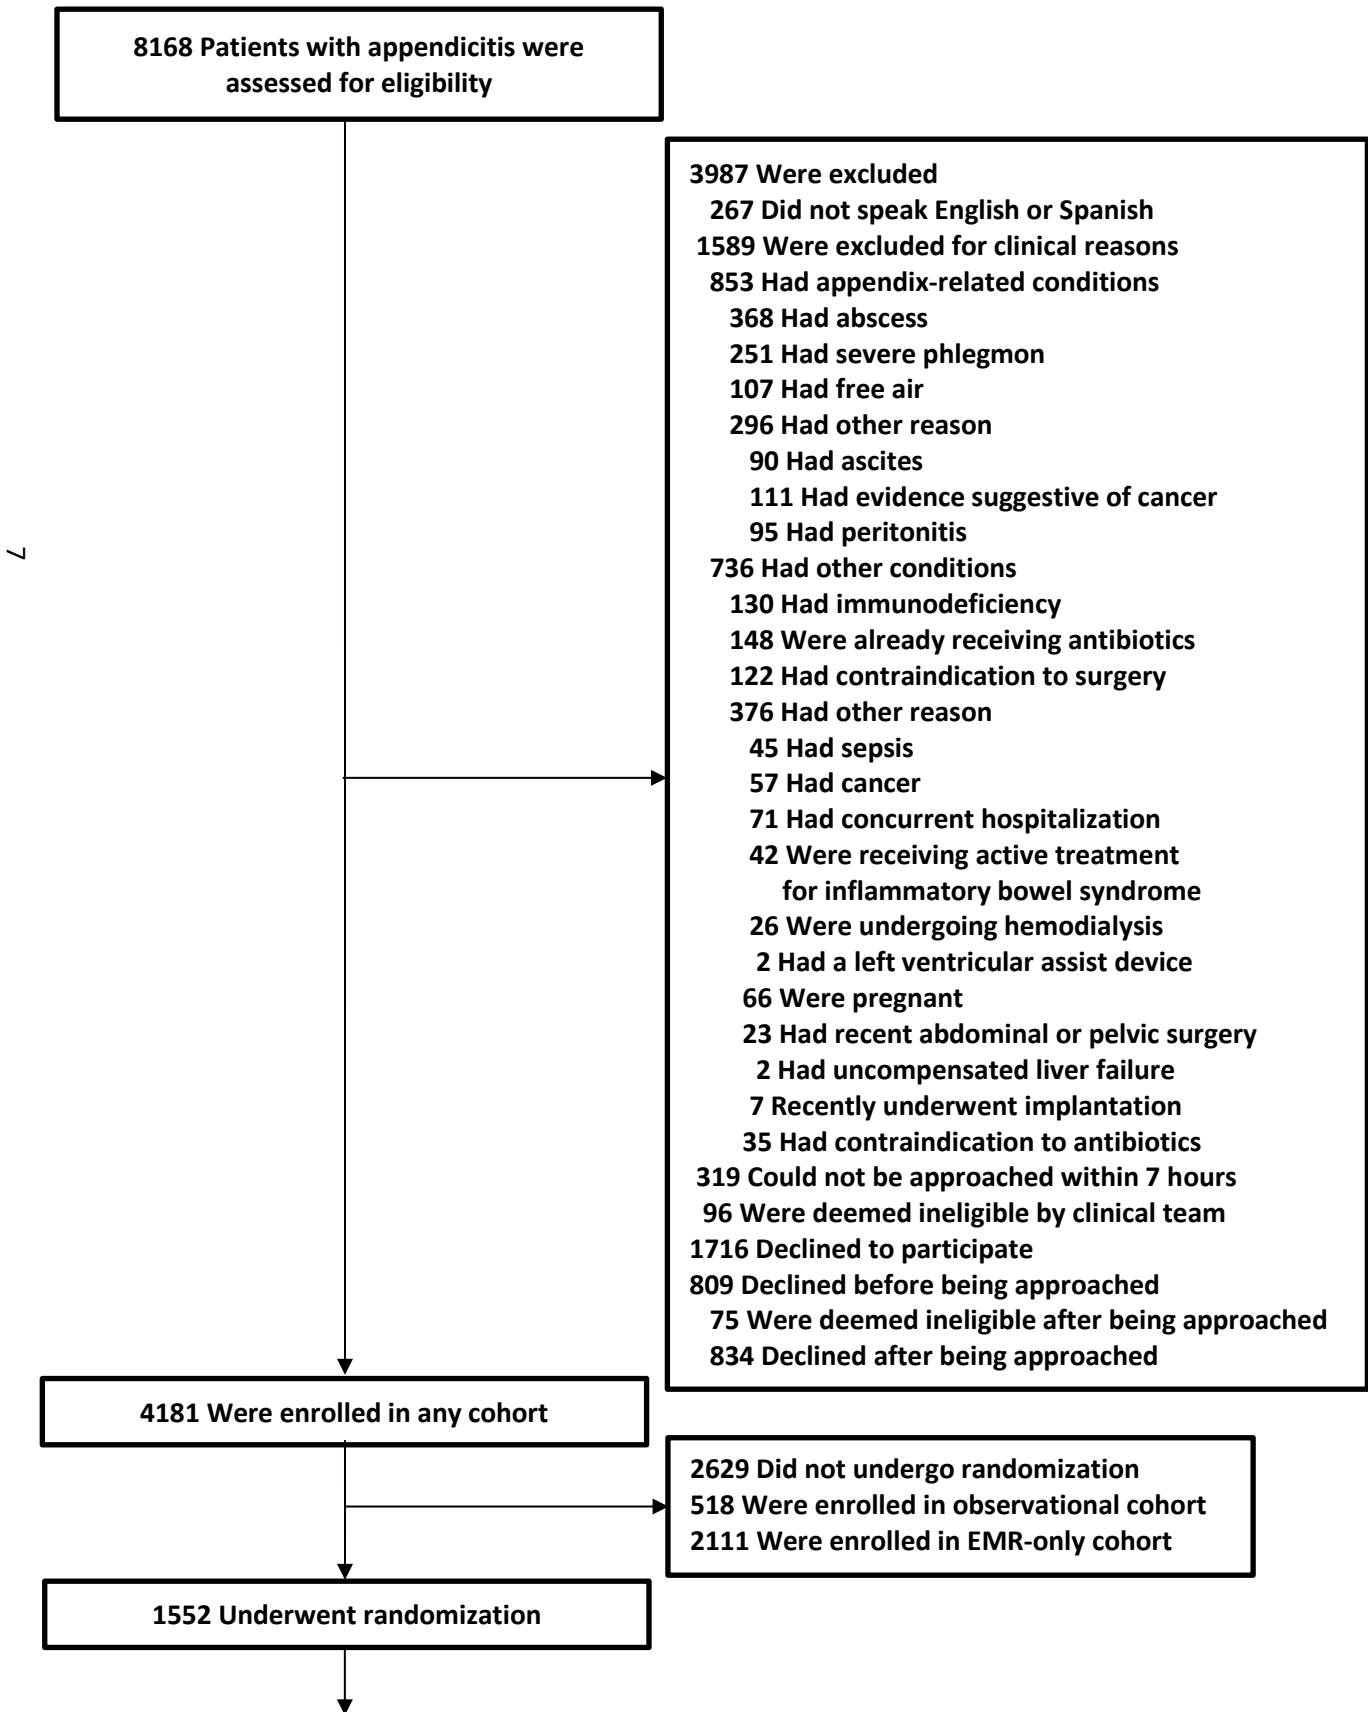

**776 Were assigned to receive antibiotics**

**8 Received first antibiotic dose after 24 hours  
42 Underwent appendectomy within 24 hours**

**726 Were included in study population**

**335 Were discharged within 24 hours  
165 Were discharged at 0-12 hours  
172 Were discharged at >12-24 hours**

**391 Were discharged after 24 hours**

**eFigure 2. Cumulative Incidence of Appendectomy Through Two Years in the Antibiotic Group by Emergency Department Discharge within 24 Hours or Later**

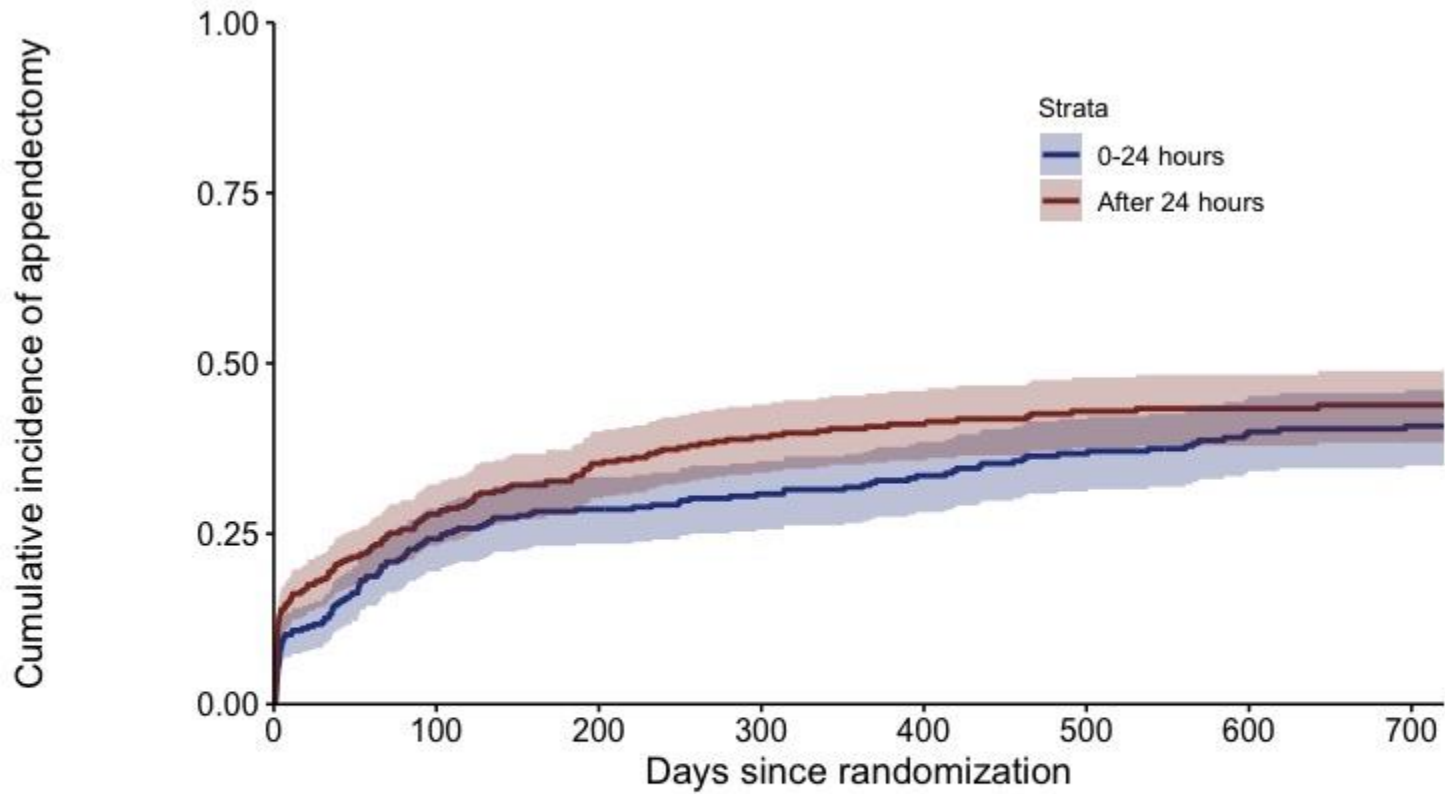

|        |                | Number at risk           |     |     |     |     |     |     |     |
|--------|----------------|--------------------------|-----|-----|-----|-----|-----|-----|-----|
| Strata | 0-24 hours     | 335                      | 245 | 225 | 212 | 185 | 176 | 142 | 140 |
|        | After 24 hours | 391                      | 258 | 223 | 195 | 155 | 150 | 110 | 109 |
|        |                | 0                        | 100 | 200 | 300 | 400 | 500 | 600 | 700 |
|        |                | Days since randomization |     |     |     |     |     |     |     |
