# Supplementary material for: Analysis of Outcomes Associated With Outpatient Management of Nonoperatively Treated Patients With Appendicitis
Source: PubMed Central journal article supplement (PMC9250049; doi:10.1001/jamanetworkopen.2022.20039), 2022-07-01
Supplement: jamanetwopen-e2220039-s002.pdf [file jamanetwopen-e2220039-s002.pdf]

\*Indicates required information. Only first name, last name, and suffix will appear in PubMed.

| <b>*Group Name(s): Writing Group for the CODA Collaborative</b> |                   |                              |                  |                                                                 |                                          |                                                         |                                                                                            |
|-----------------------------------------------------------------|-------------------|------------------------------|------------------|-----------------------------------------------------------------|------------------------------------------|---------------------------------------------------------|--------------------------------------------------------------------------------------------|
| <b>*First Name and Middle Initial(s)</b>                        | <b>*Last Name</b> | <b>*Suffix (eg, Jr, III)</b> | Academic Degrees | Institution                                                     | Location (city, state/province, country) | Role or Contribution, eg, chair, principal investigator | Group (if more than 1 Group listed in the byline) and/or Subgroup (eg, Steering Committee) |
| Charles                                                         | Parsons           |                              | MD               | Beth Israel Deaconess Medical Center                            | Boston, MA                               | Co-Investigator                                         | Clinical Coordinating Center                                                               |
| Stephen                                                         | Odom              |                              | MD               | Beth Israel Deaconess Medical Center                            | Boston, MA                               | Co-Investigator                                         | Clinical Coordinating Center                                                               |
| Randall                                                         | Cooper            |                              |                  | Columbia University Medical Center                              | New York, NY                             | Co-Investigator                                         | Clinical Coordinating Center                                                               |
| Katherine                                                       | Fischkoff         |                              | MD               | Columbia University Medical Center                              | New York, NY                             | Co-Investigator                                         | Clinical Coordinating Center                                                               |
| Brant                                                           | Putnam            |                              | MD               | Harbor- University of California Los Angeles Medical Center     | Los Angeles, CA                          | Co-Investigator                                         | Clinical Coordinating Center                                                               |
| Dennis                                                          | Kim               |                              | MD               | Harbor- University of California Los Angeles Medical Center     | Los Angeles, CA                          | Co-Investigator                                         | Clinical Coordinating Center                                                               |
| Erin C.                                                         | Howell            |                              | MD               | Harbor- University of California Los Angeles Medical Center     | Los Angeles, CA                          | Co-Investigator                                         | Clinical Coordinating Center                                                               |
| Lara H.                                                         | Spence            |                              | MD               | Harbor- University of California Los Angeles Medical Center     | Los Angeles, CA                          | Co-Investigator                                         | Clinical Coordinating Center                                                               |
| Ross                                                            | Fleischman        |                              | MD               | Harbor- University of California Los Angeles Medical Center     | Los Angeles, CA                          | Co-Investigator                                         | Clinical Coordinating Center                                                               |
| Erika                                                           | Wolff             |                              | PhD              | Harborview Medical Center                                       | Seattle, WA                              | Co-Investigator                                         | Executive Committee                                                                        |
| Farhood                                                         | Farjah            |                              | MD, MPH          | Harborview Medical Center                                       | Seattle, WA                              | Co-Investigator                                         |                                                                                            |
| Hikmatullah                                                     | Arif              |                              |                  | Harborview Medical Center                                       | Seattle, WA                              | Study Staff                                             | Clinical Coordinating Center                                                               |
| Kelsey                                                          | Pullar            |                              | MPH              | Harborview Medical Center                                       | Seattle, WA                              | Study Staff                                             | Clinical Coordinating Center                                                               |
| Laura                                                           | Hennessey         |                              | RN               | Harborview Medical Center                                       | Seattle, WA                              | Study Staff                                             | Clinical Coordinating Center                                                               |
| Alyssa                                                          | Hayward           |                              |                  | Henry Ford Health Hospital                                      | Detroit, MI                              | Study Staff                                             | Clinical Coordinating Center                                                               |
| Lillian Adrianna                                                | Hayes             |                              |                  | Henry Ford Health Hospital                                      | Detroit, MI                              | Study Staff                                             | Clinical Coordinating Center                                                               |
| Vance                                                           | Sohn              |                              | MD               | Madigan Army Medical Center                                     | Joint Base Lewis-McChord,                | Co-Investigator                                         | Clinical Coordinating Center                                                               |
| Bruce                                                           | Chung             |                              | MD               | Maine Medical Center                                            | Portland, ME                             | Co-Investigator                                         | Clinical Coordinating Center                                                               |
| Damien                                                          | Carter            |                              | MD               | Maine Medical Center                                            | Portland, ME                             | Co-Investigator                                         | Clinical Coordinating Center                                                               |
| David                                                           | MacKenzie         |                              | MD               | Maine Medical Center                                            | Portland, ME                             | Co-Investigator                                         | Clinical Coordinating Center                                                               |
| Debra                                                           | Burris            |                              | RN               | Maine Medical Center                                            | Portland, ME                             | Study Staff                                             | Clinical Coordinating Center                                                               |
| Joseph                                                          | Mack              |                              | MD               | Maine Medical Center                                            | Portland, ME                             | Co-Investigator                                         | Clinical Coordinating Center                                                               |
| Terilee                                                         | Gerry             |                              | MS, RN           | Maine Medical Center                                            | Portland, ME                             | Study Staff                                             | Clinical Coordinating Center                                                               |
| Darin                                                           | Saltzman          |                              | MD, PhD          | Olive View- University of California Los Angeles Medical Center | Los Angeles, CA                          | Co-Investigator                                         | Clinical Coordinating Center                                                               |
| Debbie                                                          | Mireles           |                              | NP               | Olive View- University of California Los Angeles Medical Center | Los Angeles, CA                          | Study Staff                                             | Clinical Coordinating Center                                                               |
| Formosa                                                         | Chen              |                              | MD, MPH          | Olive View- University of California Los Angeles Medical Center | Los Angeles, CA                          | Co-Investigator                                         | Clinical Coordinating Center                                                               |
| Kavitha                                                         | Pathmarajah       |                              | MPH              | Olive View- University of California Los Angeles Medical Center | Los Angeles, CA                          | Study Staff                                             | Clinical Coordinating Center                                                               |

## Supplemental Online Content: Nonauthor Collaborators

\*Indicates required information. Only first name, last name, and suffix will appear in PubMed.

| *First Name and Middle Initial(s) | *Last Name | *Suffix (eg, Jr, III) | Academic Degrees | Institution                                                     | Location (city, state/province, country) | Role or Contribution, eg, chair, principal investigator | Group (if more than 1 Group listed in the byline) and/or Subgroup (eg, Steering Committee) |
|-----------------------------------|------------|-----------------------|------------------|-----------------------------------------------------------------|------------------------------------------|---------------------------------------------------------|--------------------------------------------------------------------------------------------|
| Paul J                            | Schmit     |                       | MD               | Olive View- University of California Los Angeles Medical Center | Los Angeles, CA                          | Co-Investigator                                         | Clinical Coordinating Center                                                               |
| Robert                            | Bennion    |                       | MD               | Olive View- University of California Los Angeles Medical Center | Los Angeles, CA                          | Co-Investigator                                         | Clinical Coordinating Center                                                               |
| Melinda                           | Gibbons    |                       | MD               | Olive View- University of California Los Angeles Medical Center | Los Angeles, CA                          | Co-Investigator                                         | Clinical Coordinating Center                                                               |
| Bruce                             | Wolfe      |                       | MD               | Oregon Health & Science University                              | Portland, OR                             | Clinical Reviewer                                       | Data Safety and Monitoring Board                                                           |
| Elliott                           | Skopin     |                       | BS               | PAB                                                             | Seattle, WA                              | Advisor                                                 | Patient Advisory Board                                                                     |
| Heather                           | VanDusen   |                       | BS               | PAB                                                             | Seattle, WA                              | Advisor                                                 | Patient Advisory Board                                                                     |
| Kimberly                          | Deeney     |                       | BA               | PAB                                                             | Medford, MA                              | Advisor                                                 | Patient Advisory Board                                                                     |
| Mary                              | Guiden     |                       | BA               | PAB                                                             | Fort Collins, CO                         | Advisor                                                 | Patient Advisory Board                                                                     |
| Meridith                          | Weiss      |                       | MPH              | PAB                                                             | Seattle, WA                              | Advisor                                                 | Patient Advisory Board                                                                     |
| Miriam                            | Hernandez  |                       |                  | PAB                                                             |                                          | Advisor                                                 | Patient Advisory Board                                                                     |
| Brandon                           | Tudor      |                       | MD               | Providence Regional Medical Center Everett                      | Everett, Washington                      | Co-Investigator                                         | Clinical Coordinating Center                                                               |
| Careen                            | Foster     |                       | MD               | Providence Regional Medical Center Everett                      | Everett, Washington                      | Co-Investigator                                         | Clinical Coordinating Center                                                               |
| Shaina                            | Schaetzel  |                       | MD               | Providence Regional Medical Center Everett                      | Everett, Washington                      | Co-Investigator                                         | Clinical Coordinating Center                                                               |
| Arden                             | Morris     |                       | MD, MPH          | Stanford University                                             | Stanford, CA                             | Clinical Reviewer                                       | Data Safety and Monitoring Board                                                           |
| Dayna                             | Morgan     |                       | MSNBC            | Swedish Medical Center                                          | Seattle, WA                              | Study Staff                                             | Clinical Coordinating Center                                                               |
| John                              | Tschirhart |                       | MD               | Swedish Medical Center                                          | Seattle, WA                              | Co-Investigator                                         | Clinical Coordinating Center                                                               |
| Julie                             | Wallick    |                       | BS, BA           | Swedish Medical Center                                          | Seattle, WA                              | Study Staff                                             | Clinical Coordinating Center                                                               |
| Katherine                         | Mandell    |                       | MD, MPH          | Swedish Medical Center                                          | Seattle, WA                              | Co-Investigator                                         | Clinical Coordinating Center                                                               |
| Ryan                              | Martinez   |                       | MD               | Swedish Medical Center                                          | Seattle, WA                              | Co-Investigator                                         | Clinical Coordinating Center                                                               |
| Sean                              | Wells      |                       | MD               | Swedish Medical Center                                          | Seattle, WA                              | Co-Investigator                                         | Clinical Coordinating Center                                                               |
| Steven                            | Steinberg  |                       | MD               | The Ohio State University Wexner Medical Center                 | Columbus, OH                             | Co-Investigator                                         | Clinical Coordinating Center                                                               |
| Jason                             | Maggi      |                       | MD               | Tisch Hospital NYU Langone Medical Center                       | New York, NY                             | Co-Investigator                                         | Clinical Coordinating Center                                                               |
| Kristyn                           | Pierce     |                       | MS               | Tisch Hospital NYU Langone Medical Center                       | New York, NY                             | Co-Investigator                                         | Clinical Coordinating Center                                                               |
| Marcovalerio                      | Melis      |                       | MD               | Tisch Hospital NYU Langone Medical Center                       | New York, NY                             | Co-Investigator                                         | Clinical Coordinating Center                                                               |
| Mohamad                           | Abouzeid   |                       | MD               | Tisch Hospital NYU Langone Medical Center                       | New York, NY                             | Co-Investigator                                         | Clinical Coordinating Center                                                               |
| Paresh                            | Shah       |                       | MD               | Tisch Hospital NYU Langone Medical Center                       | New York, NY                             | Co-Investigator                                         | Clinical Coordinating Center                                                               |

## Supplemental Online Content: Nonauthor Collaborators

\*Indicates required information. Only first name, last name, and suffix will appear in PubMed.

| *First Name and Middle Initial(s) | *Last Name   | *Suffix (eg, Jr, III) | Academic Degrees | Institution                                            | Location (city, state/province, country) | Role or Contribution, eg, chair, principal investigator | Group (if more than 1 Group listed in the byline) and/or Subgroup (eg, Steering Committee) |
|-----------------------------------|--------------|-----------------------|------------------|--------------------------------------------------------|------------------------------------------|---------------------------------------------------------|--------------------------------------------------------------------------------------------|
| Prashant                          | Sinha        |                       | MD               | Tisch Hospital NYU Langone Medical Center              | New York, NY                             | Co-Investigator                                         | Clinical Coordinating Center                                                               |
| Cathy                             | Fairfield    |                       | BSN              | University of Iowa Healthcare                          | Iowa City, IA                            | Study Staff                                             | Clinical Coordinating Center                                                               |
| Dionne                            | Skeete       |                       | MD               | University of Iowa Healthcare                          | Iowa City, IA                            | Co-Investigator                                         | Clinical Coordinating Center                                                               |
| Cindy                             | Hsu          |                       | MD, PHD          | University of Michigan Medical Center                  | Ann Arbor, MI                            | Co-Investigator                                         | Clinical Coordinating Center                                                               |
| Krishnan                          | Raghavendran |                       | MBBS, MS         | University of Michigan Medical Center                  | Ann Arbor, MI                            | Study Staff                                             | Clinical Coordinating Center                                                               |
| Nathan                            | Haas         |                       | MD               | University of Michigan Medical Center                  | Ann Arbor, MI                            | Co-Investigator                                         | Clinical Coordinating Center                                                               |
| Norman                            | Olbrich      |                       |                  | University of Michigan Medical Center                  | Ann Arbor, MI                            | Study Staff                                             | Clinical Coordinating Center                                                               |
| Pauline                           | Park         |                       | MD               | University of Michigan Medical Center                  | Ann Arbor, MI                            | Co-Investigator                                         | Clinical Coordinating Center                                                               |
| Hasan                             | Alam         |                       | MD               | University of Michigan Medical Center                  | Ann Arbor, MI                            | Co-Investigator                                         | Clinical Coordinating Center                                                               |
| Deepti                            | Patki        |                       | MS               | University of Mississippi Medical Center               | Jackson, MS                              | Study Staff                                             | Clinical Coordinating Center                                                               |
| Rebekah K.                        | Peacock      |                       | RN               | University of Mississippi Medical Center               | Jackson, MS                              | Study Staff                                             | Clinical Coordinating Center                                                               |
| Donald M.                         | Yealy        |                       | MD               | University of Pittsburgh Medical Center                | Pittsburgh, PA                           | Clinical Reviewer                                       | Data Safety and Monitoring Board                                                           |
| Debbie                            | Lew          |                       |                  | University of Texas Lyndon B. Johnson General Hospital | Houston, TX                              | Study Staff                                             | Clinical Coordinating Center                                                               |
| Karla                             | Bernardi     |                       | MD               | University of Texas Lyndon B. Johnson General Hospital | Houston, TX                              | Co-Investigator                                         | Clinical Coordinating Center                                                               |
| Naila                             | Dhanani      |                       | MD               | University of Texas Lyndon B. Johnson General Hospital | Houston, TX                              | Co-Investigator                                         | Clinical Coordinating Center                                                               |
| Oscar                             | Olavarria    |                       | MD               | University of Texas Lyndon B. Johnson General Hospital | Houston, TX                              | Co-Investigator                                         | Clinical Coordinating Center                                                               |
| Stephanie                         | Marquez      |                       |                  | University of Texas Lyndon B. Johnson General Hospital | Houston, TX                              | Co-Investigator                                         | Clinical Coordinating Center                                                               |
| Tien C.                           | Ko           |                       | MD               | University of Texas Lyndon B. Johnson General Hospital | Houston, TX                              | Co-Investigator                                         | Clinical Coordinating Center                                                               |
| Amber                             | Sabbatini    |                       | MD, MPH          | University of Washington                               | Seattle, WA                              | Co-Investigator                                         | Clinical Coordinating Center                                                               |
| Estell                            | Williams     |                       | MD               | University of Washington                               | Seattle, WA                              | Co-Investigator                                         | Clinical Coordinating Center                                                               |
| Karen                             | Horvath      |                       | MD               | University of Washington                               | Seattle, WA                              | Co-Investigator                                         | Clinical Coordinating Center                                                               |
| Zoe                               | Parr         |                       | MD               | University of Washington                               | Seattle, WA                              | Co-Investigator                                         | Clinical Coordinating Center                                                               |
| Karen F.                          | Miller       |                       | RN, MPA          | Vanderbilt University Medical Center                   | Nashville, Tennessee                     | Study Staff                                             | Clinical Coordinating Center                                                               |

\*Indicates required information. Only first name, last name, and suffix will appear in PubMed.

| <b>*First Name and Middle Initial(s)</b> | <b>*Last Name</b> | <b>*Suffix (eg, Jr, III)</b> | Academic Degrees | Institution                          | Location (city, state/province, country) | Role or Contribution, eg, chair, principal investigator | Group (if more than 1 Group listed in the byline) and/or Subgroup (eg, Steering Committee) |
|------------------------------------------|-------------------|------------------------------|------------------|--------------------------------------|------------------------------------------|---------------------------------------------------------|--------------------------------------------------------------------------------------------|
| Kelly M.                                 | Moser             |                              |                  | Vanderbilt University Medical Center | Nashville, Tennessee                     | Study Staff                                             | Clinical Coordinating Center                                                               |
| Abigail                                  | Wiebusch          |                              | MD               | Virginia Mason Medical Center        | Seattle, WA                              | Co-Investigator                                         | Clinical Coordinating Center                                                               |
| Julianna                                 | Yu                |                              | MD               | Virginia Mason Medical Center        | Seattle, WA                              | Co-Investigator                                         | Clinical Coordinating Center                                                               |
| Scott                                    | Osborn            |                              | MD               | Virginia Mason Medical Center        | Seattle, WA                              | Co-Investigator                                         | Clinical Coordinating Center                                                               |
| Billie                                   | Johnsson          |                              | MS               | Weill Cornell Medical Center         | New York, NY                             | Co-Investigator                                         | Clinical Coordinating Center                                                               |
| Karla                                    | Ballman           |                              | PhD              | Weill Cornell Medical Center         | New York, NY                             | Clinical Reviewer                                       | Data Safety and Monitoring Board                                                           |
| Lauren                                   | Mount             |                              | MD               | Weill Cornell Medical Center         | New York, NY                             | Co-Investigator                                         | Clinical Coordinating Center                                                               |
| Robert J.                                | Winchell          |                              | MD               | Weill Cornell Medical Center         | New York, NY                             | Co-Investigator                                         | Clinical Coordinating Center                                                               |
| Sunday                                   | Clark             |                              | ScD, MPH         | Weill Cornell Medical Center         | New York, NY                             | Co-Investigator                                         | Clinical Coordinating Center                                                               |
| Thomas                                   | Diflo             |                              | MD               | Westchester Medical Center           | Valhalla, NY                             | Clinical Reviewer                                       | Data Safety and Monitoring Board                                                           |
| Kathleen                                 | O'Connor          |                              | EdD              |                                      |                                          | Clinical Reviewer                                       | Data Safety and Monitoring Board                                                           |
| Olga                                     | Owens             |                              | N-PC             |                                      | Las Vegas, NV                            | Clinical Reviewer                                       | Data Safety and Monitoring Board                                                           |
